# Supplementary material for: Effects of Hydroxytyrosol Supplementation on Performance, Fat and Blood Parameters of Broiler Chickens
Source: MDPI journal article supplement (doi:10.3390/ani14010119), 2023-12-28
Supplement: s1 [file s1]

**Table S1.** Fatty acids (expressed as g/100g) of breast meat from broiler chickens fed different levels of hydroxytyrosol at 42 days old.

|                                       | 0 mg HT/ kg | 5 mg HT/kg | 10 mg HT/ kg | 50 mg HT/ kg | <i>p-Value</i> |
|---------------------------------------|-------------|------------|--------------|--------------|----------------|
| Butyric acid (C4:0)                   | <0.10       | <0.10      | <0.10        | <0.10        | 0.40           |
| Caproic acid (C6:0)                   | <0.10       | <0.10      | <0.10        | <0.10        | 0.40           |
| Caprylic acid (C8:0)                  | <0.10       | <0.10      | <0.10        | <0.10        | 0.40           |
| Capric acid (C10:0)                   | <0.10       | <0.10      | <0.10        | <0.10        | 0.40           |
| n-Undecylic acid (C11:0)              | <0.10       | <0.10      | <0.10        | <0.10        | 0.40           |
| Lauric acid (C12:0)                   | <0.10       | <0.10      | <0.10        | <0.10        | 0.40           |
| n-Tridecylic acid (C13:0)             | <0.10       | <0.10      | <0.10        | <0.10        | 0.40           |
| Myristic acid (C14:0)                 | <0.10       | <0.10      | <0.10        | <0.10        | 0.40           |
| Myristoleic acid (C14:1)              | <0.10       | <0.10      | <0.10        | <0.10        | 0.40           |
| Pentadecylic acid (C15:0)             | <0.10       | <0.10      | <0.10        | <0.10        | 0.40           |
| Cis-10-Pentadecenoic acid (C15:1n5)   | <0.10       | <0.10      | <0.10        | <0.10        | 0.40           |
| Palmitoleic acid (16:1)               | <0.10       | <0.10      | <0.10        | <0.10        | 0.40           |
| Margaric acid (C17:0)                 | <0.10       | <0.10      | <0.10        | <0.10        | 0.40           |
| Cis-8-Heptadecenoic (C17:1n9)         | <0.10       | <0.10      | <0.10        | <0.10        | 0.40           |
| Elaidic acid (C18:1n9t)               | <0.10       | <0.10      | <0.10        | <0.10        | 0.40           |
| Linolelaidic acid (C18:2n6t)          | <0.10       | <0.10      | <0.10        | <0.10        | 0.40           |
| Arachidic acid (C20:0)                | <0.10       | <0.10      | <0.10        | <0.10        | 0.40           |
| gamma-Linolenic acid (C18:3n6)        | <0.10       | <0.10      | <0.10        | <0.10        | 0.40           |
| Cis-11-Eiconosenoic acid (C20:1n9)    | <0.10       | <0.10      | <0.10        | <0.10        | 0.40           |
| alfa-Linolenic acid (C18:3n3)         | <0.10       | <0.10      | <0.10        | <0.10        | 0.40           |
| n-Heneicosylic acid (C21:0)           | <0.10       | <0.10      | <0.10        | <0.10        | 0.40           |
| Cis-11,14-Eicosenoic acid (C20:2n6)   | <0.10       | <0.10      | <0.10        | <0.10        | 0.40           |
| Behenic acid (C22:0)                  | <0.10       | <0.10      | <0.10        | <0.10        | 0.40           |
| Cis-11,14,17-Eicosatrienic (C20:3n6)  | <0.10       | <0.10      | <0.10        | <0.10        | 0.40           |
| Erucic acid (C22:1n9)                 | <0.10       | <0.10      | <0.10        | <0.10        | 0.40           |
| Dihomo-gamma-Linolenic acid (C20:3n3) | <0.10       | <0.10      | <0.10        | <0.10        | 0.40           |
| Arachidonic acid (C20:4n6)            | <0.10       | <0.10      | <0.10        | <0.10        | 0.40           |
| Tricosylic acid (C23:0)               | <0.10       | <0.10      | <0.10        | <0.10        | 0.40           |

|                                                                 |       |       |       |       |      |
|-----------------------------------------------------------------|-------|-------|-------|-------|------|
| Docosadienoic acid<br>(C22:2)                                   | <0.10 | <0.10 | <0.10 | <0.10 | 0.40 |
| Lignoceric acid (24:0)                                          | <0.10 | <0.10 | <0.10 | <0.10 | 0.40 |
| Cis-5,8,11,14,17-<br>Eicosapentaenoic acid<br>(EPA: C20:5n3)    | <0.10 | <0.10 | <0.10 | <0.10 | 0.40 |
| Nervonic acid (C24:1n9)                                         | <0.10 | <0.10 | <0.10 | <0.10 | 0.40 |
| Cis-4,7,10,13,16,19-<br>Docosaheptaenoic acid<br>(DHA: C22:6n3) | <0.10 | <0.10 | <0.10 | <0.10 | 0.40 |
| Trans monounsaturated<br>fatty acid                             | <0.50 | <0.50 | <0.50 | <0.50 | 0.40 |
| Trans polyunsaturated<br>fatty acid                             | <0.50 | <0.50 | <0.50 | <0.50 | 0.40 |
| Trans fatty acids                                               | <0.10 | <0.10 | <0.10 | <0.10 | 0.40 |
| Omega 3 fatty acids                                             | <0.10 | <0.10 | <0.10 | <0.10 | 0.40 |

---
